# Supplementary material for: Single-cell transcriptomic profiling reveals distinct mechanical responses between normal and diseased tendon progenitor cells
Source: PubMed Central journal article supplement — Cell Rep Med. 2021 Jul 21;2(7):100343. doi: 10.1016/j.xcrm.2021.100343 (PMC8324492; doi:10.1016/j.xcrm.2021.100343), 2021-07-21
Supplement: mmc1.pdf [file mmc1.pdf]

**Cell Reports Medicine, Volume 2**

**Supplemental information**

**Single-cell transcriptomic profiling reveals  
distinct mechanical responses between normal  
and diseased tendon progenitor cells**

**Chris Still II, Wen-Teh Chang, Seth L. Sherman, Kyle R. Sochacki, Jason L. Dragoo, and Lei S. Qi**

## **SUPPLEMENTAL INFORMATION**

### **Single-Cell transcriptomic profiling reveals distinct mechanical responses between normal and diseased tendon progenitor cells**

Chris Still II<sup>1\*</sup>, Wen-Teh Chang<sup>2\*</sup>, Seth L. Sherman<sup>2</sup>, Kyle R. Sochacki<sup>2</sup>, Jason L. Dragoo<sup>3</sup>, Lei S. Qi<sup>4,5,6,7,8</sup>

SUPPLEMENTAL FIGURES

A Tendon Thickness

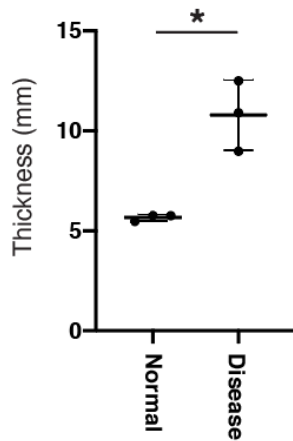

B

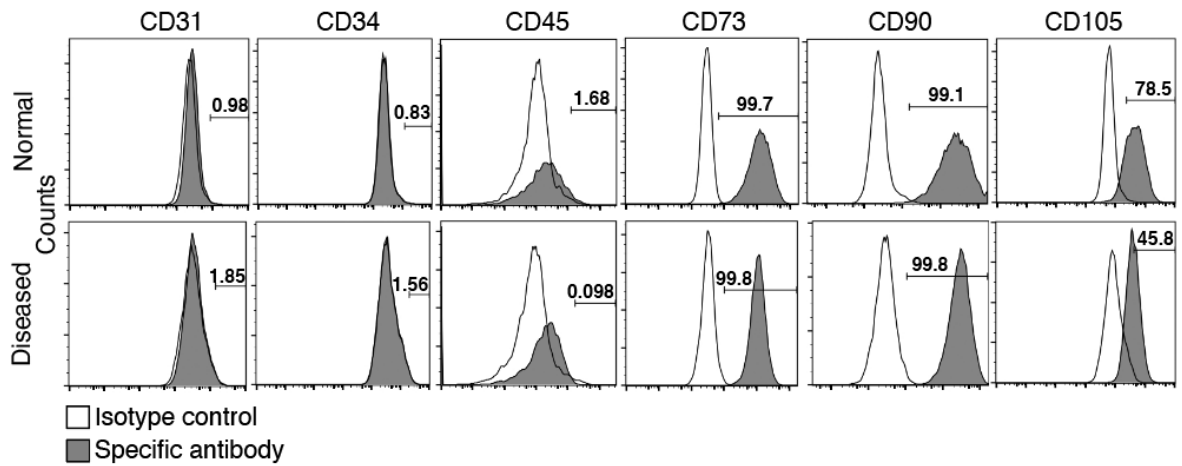

**Figure S1: Thickness of tendon tissue from normal and disease cohorts and TPC marker expression.** A) Thickness of tissue measured during tendon tissue extraction. Measurements are made in millimeters (3 biological replicates per cohort). \* denotes a p value <0.05. B) TPC marker antibody staining panel for patellar tendon derived TPC patient samples (plots are representative of one biological sample per cohort). These tendon samples and TPCs derived therein are the cell source for data in **Figure 1**. Related to **Figure 1**.

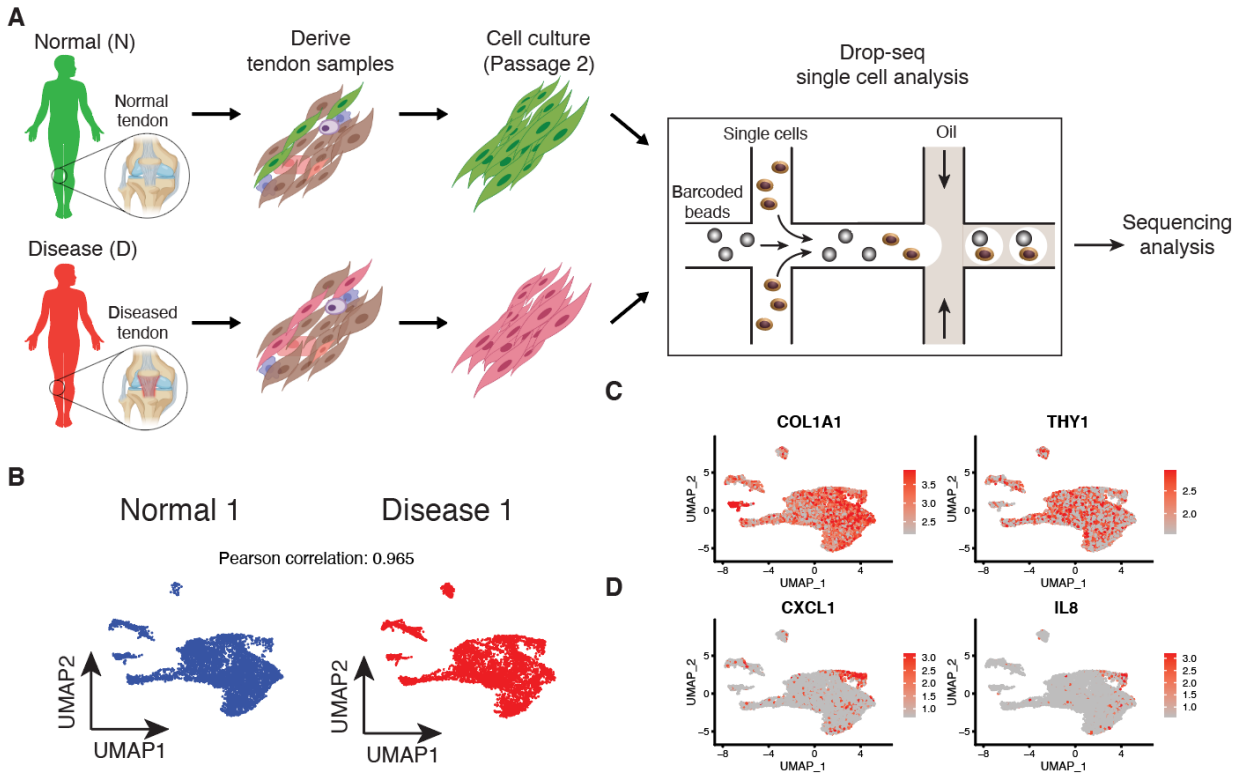

**Figure S2: Single cell transcriptomic profiling of the resting TPCs from normal and diseased samples reveal TPC subsets.** (A) Overview of scRNA-seq experiment. (B) UMAP plots of cells from the normal cohort and diseased cohort. One biological replicate per cohort (C) UMAP plot of expression of *COL1A1* and *THY1*, general TPC markers. (D) UMAP plot of expression of *CXCL1* and *IL8* in the dataset. (C) and (D) show cells from both the normal and diseased sample. Related to **Figure 1** and **Figure 2**.

### TPC correlations

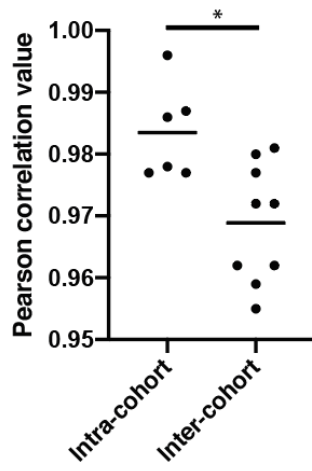

**Figure S3: Intra vs inter cohort Pearson correlation comparison.** Pearson correlation scores for intra vs inter cohort comparisons were compared. Each dot represents a Pearson correlation. \* denotes a p value < 0.05. Related to Figure 1D.

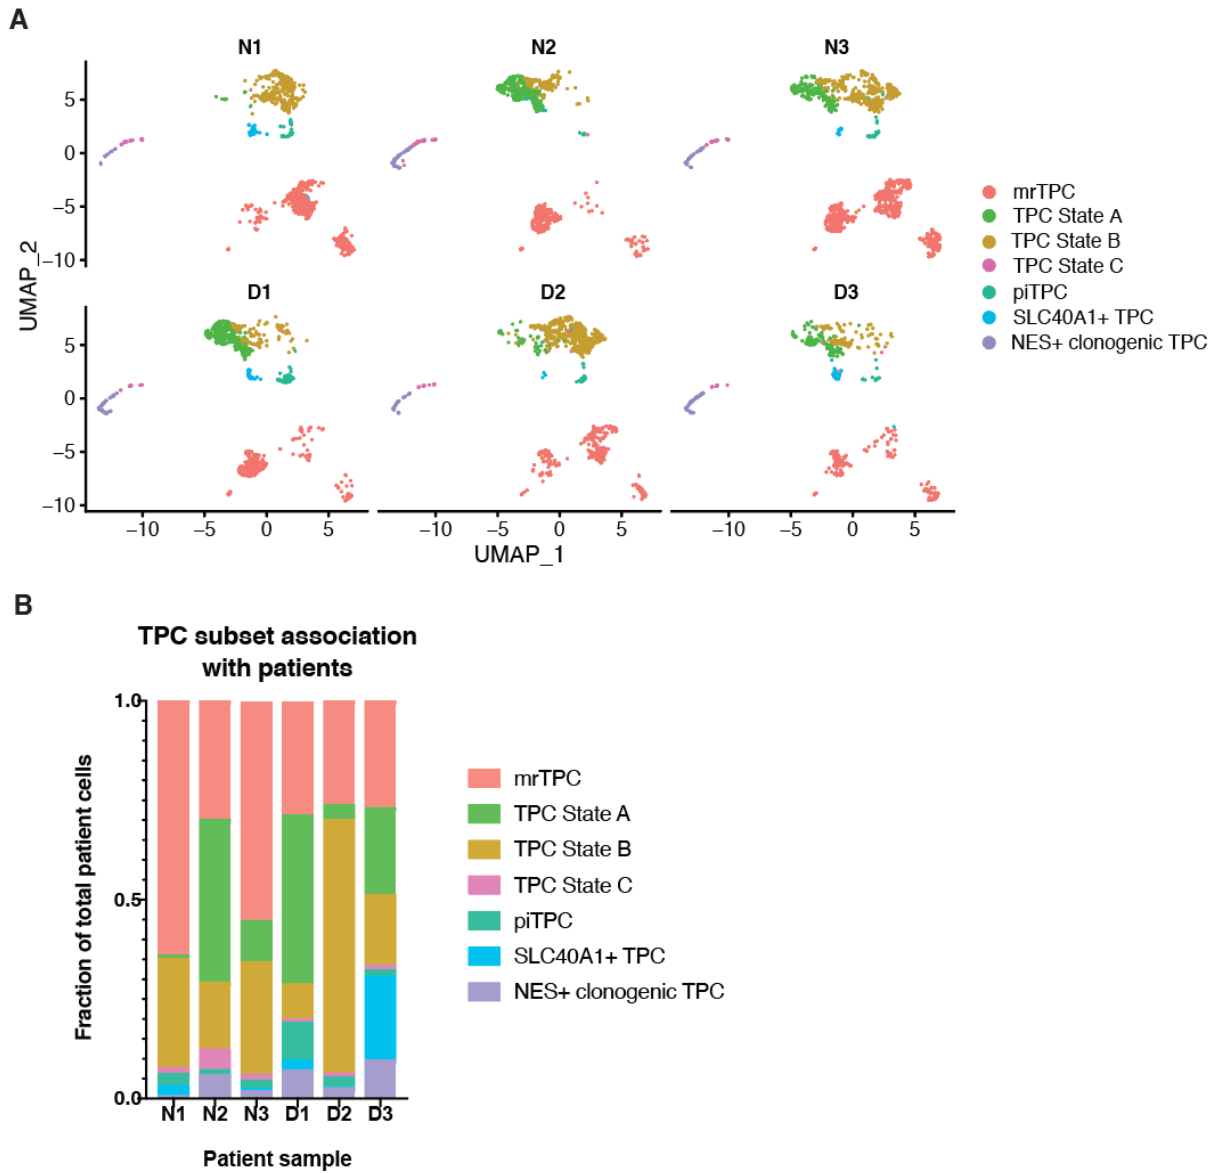

**Figure S4: Patient variability in TPC study.** A) UMAP plots depicting TPC subsets in each patient. B) Semi-quantitative display of patient TPC levels. One technical replicate per biological sample. Related to **Figure 1B-D**.

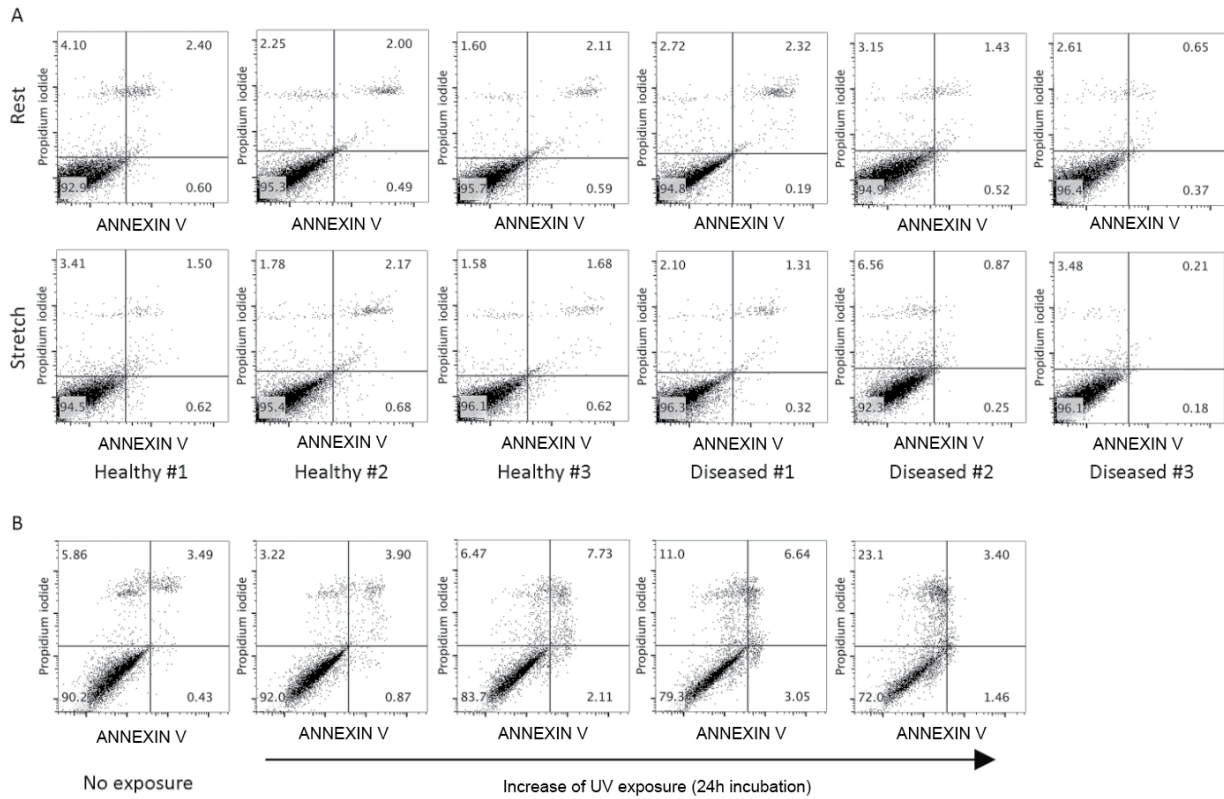

**Figure S5: Annexin V and PI staining.** Flow cytometric analysis of human TPCs for apoptosis detection in resting or after stretching conditions. A) Human TPCs were under cyclic stretch for 12 h per day/3 days, followed by a 24h resting, or left in resting condition for 4 days, then subjected to apoptosis detection by annexin V/propidium iodide staining. B) Human TPCs were either un-exposed or exposed to increased dosages of UVC ( $50 \text{ J/m}^2 - 400 \text{ J/m}^2$ ), and the same apoptosis detection was applied after a 24 hour incubation. Each panel shows a different biological replicate for the mentioned cohort. Single technical replicate per biological sample. Related to **Figure 2H**.

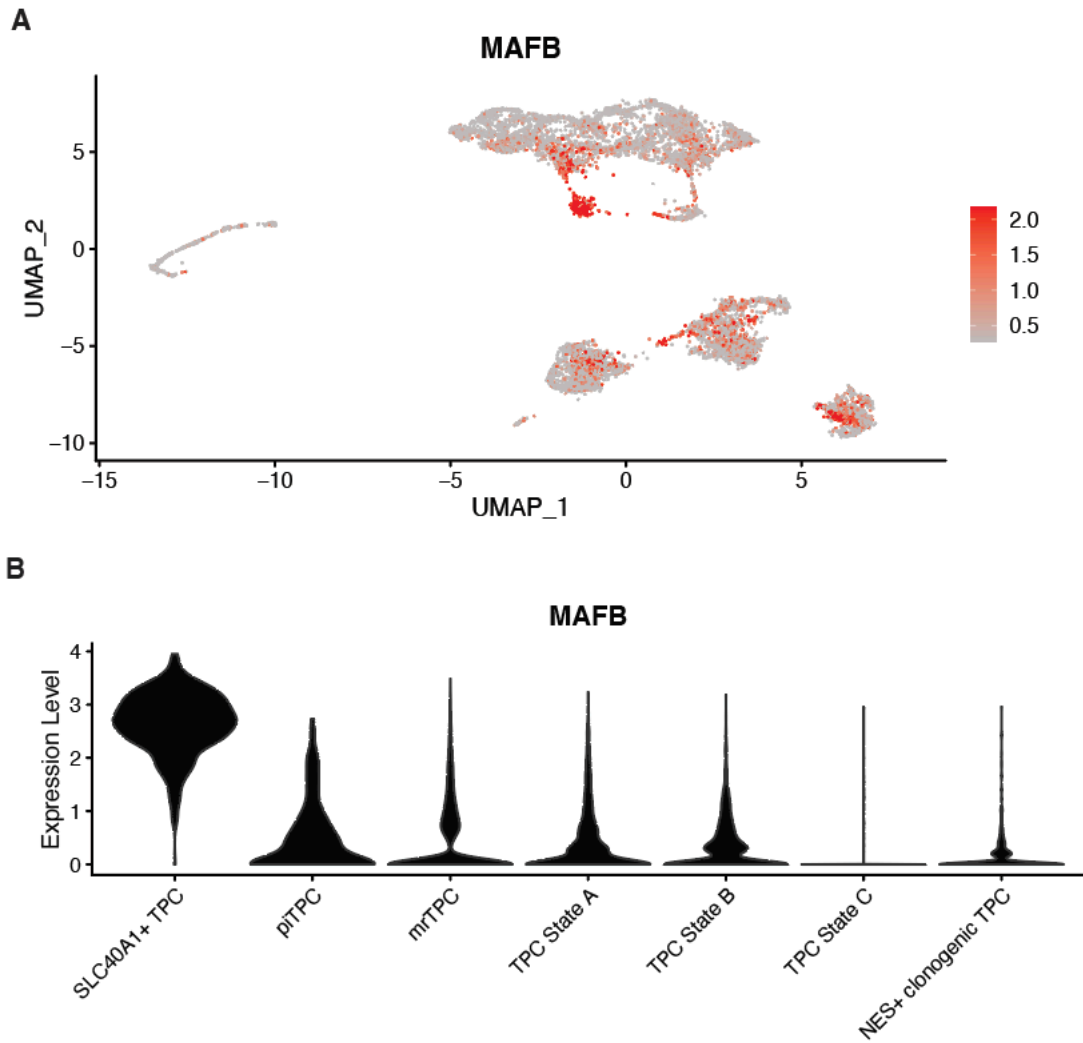

**Figure S6: SLC40A1+ TPCs are enriched in MAFB expression.** A) Gene expression plot showing expression of *MAFB*. B) Violin plot showing exceptionally high expression of *MAFB* among SLC40A1+ TPCs. Plot and violin plot constitute all 6 biological samples across both cohorts. Related to **Figure 3**.



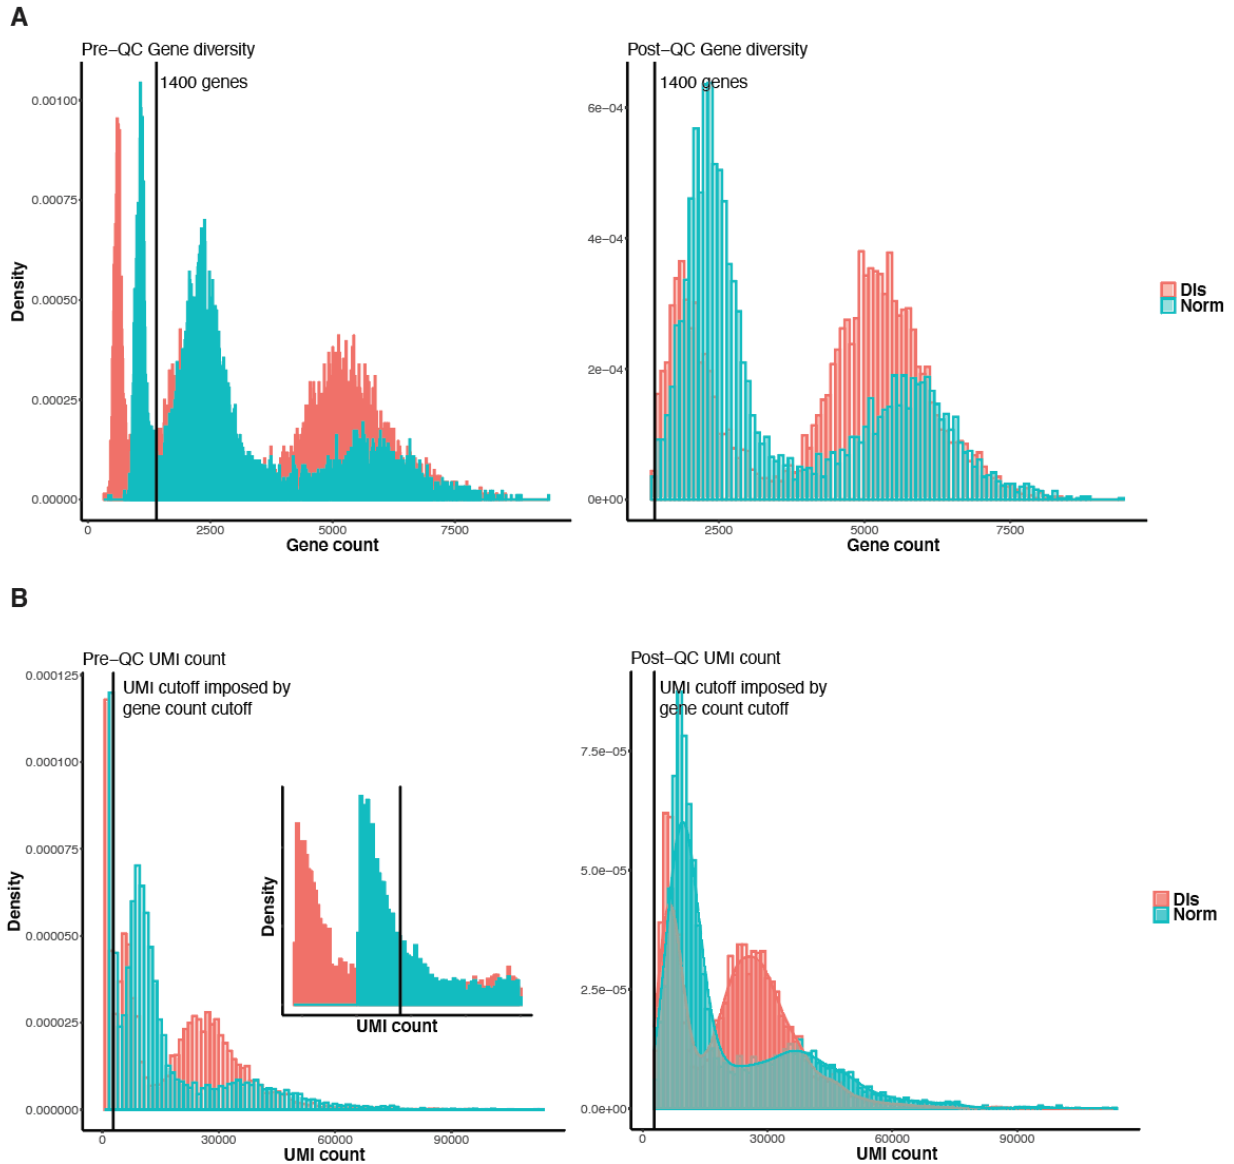

**Figure S7: QC metrics for UMI counts and gene diversity cutoff.** A) Histograms of gene diversity before and after QC cutoffs are imposed on stretched TPC data. Vertical line represents the 1400 gene cutoff used. B) Histograms of UMI counts before and after QC cutoffs are imposed on stretched TPC data. Vertical line represents the UMI cutoff imposed by the gene diversity cutoff. Related to **Figure 1**.

## SUPPLEMENTAL TABLES

**Table S1: Sample Information.** N and D in the sample column refers to normal and disease respectively. M in the gender column refers to male. Classification grade is based on the Popkin-Golman classification scale for tendon rupture. Related to **Figure 1**.

| Sample | Age (years) | Gender | Cohort       | Cell viability before scRNAseq | scRNA-seq experiment                 | Mechanical Stress  | Hash antibody Barcode                    | Traumatic vs. Insidious | Classification Grade | Duration of symptoms | Thickness of tendon tissue (mm) |
|--------|-------------|--------|--------------|--------------------------------|--------------------------------------|--------------------|------------------------------------------|-------------------------|----------------------|----------------------|---------------------------------|
| N1     | 30          | M      | Normal       | 77%/77%                        | 10X Chromium controller 3'/ Drop-seq | Stretched/ Resting | TGATGGCCTATTGGG (Biologend cat#: 394603) |                         |                      |                      | 5.75                            |
| N2     | 19          | M      | Normal       | 88%                            | 10X Chromium controller 3'           | Stretched          | GTCAACTCTTTAGCG (Biologend cat#: 394601) |                         |                      |                      | 5.47                            |
| N3     | 33          | M      | Normal       | 65%                            | 10X Chromium controller 3'           | Stretched          | AGTAAGTTCAGCGTA (Biologend cat#: 394607) |                         |                      |                      | 5.77                            |
| D1     | 33          | M      | Tendinopathy | 85%/96%                        | 10X Chromium controller 3'/ Drop-seq | Stretched/ Resting | TGATGGCCTATTGGG (Biologend cat#: 394603) | Insidious               | 3                    | 2 years              | 8.98                            |
| D2     | 26          | M      | Tendinopathy | 81%                            | 10X Chromium controller 3'           | Stretched          | AGTAAGTTCAGCGTA (Biologend cat#: 394607) | Traumatic               | 4                    | 1 year               | 10.9                            |
| D3     | 22          | M      | Tendinopathy | 87%                            | 10X Chromium controller 3'           | Stretched          | GTCAACTCTTTAGCG (Biologend cat#: 394601) | Insidious               | 3                    | 2 years              | 12.5                            |

**Table S2: TPC surface marker expression among patient TPCs.** Immunophenotyping of human TPC cell surface markers related to MSC, hematopoietic stem cells and endothelial cells. Related to **Figure 1**.

| Cohort   | Antibody | CD31+       | CD34+       | CD45+       | CD73+        | CD90+        | CD105+        |
|----------|----------|-------------|-------------|-------------|--------------|--------------|---------------|
| Healthy  | Specific | 1.75 ± 1.56 | 1.47 ± 1.26 | 2.11 ± 1.09 | 99.87 ± 0.15 | 99.47 ± 0.15 | 78.3 ± 7.60   |
|          | Isotype  | 1.46 ± 1.07 | 1.48 ± 1.15 | 0.75 ± 0.58 | 1.46 ± 0.96  | 0.46 ± 0.45  | 1.80 ± 1.66   |
| Diseased | Specific | 2.76 ± 1.86 | 2.29 ± 1.71 | 0.25 ± 0.16 | 99.67 ± 0.23 | 99.83 ± 0.06 | 60.97 ± 17.16 |
|          | Isotype  | 2.25 ± 1.75 | 2.09 ± 1.67 | 0.8 ± 0.17  | 1.14 ± 0.7   | 3.64 ± 4.5   | 2.24 ± 1.93   |

**Table S3: Stretched TPC subpopulation levels for each patient.** N and D refer to normal and disease respectively. Numbers are fractions of the total patient population cells. Related to **Figure 1**.

|                     | N1    | N2    | N3    | D1    | D2    | D3    |
|---------------------|-------|-------|-------|-------|-------|-------|
| mrTPC               | 0.638 | 0.298 | 0.551 | 0.286 | 0.259 | 0.268 |
| TPC State B         | 0.274 | 0.168 | 0.282 | 0.088 | 0.638 | 0.177 |
| TPC State A         | 0.009 | 0.408 | 0.104 | 0.424 | 0.038 | 0.219 |
| piTPC               | 0.030 | 0.013 | 0.020 | 0.095 | 0.025 | 0.016 |
| SLC40A1+ TPC        | 0.026 | 0.000 | 0.006 | 0.025 | 0.002 | 0.211 |
| NES+ clonogenic TPC | 0.008 | 0.061 | 0.021 | 0.073 | 0.027 | 0.098 |
| TPC State C         | 0.015 | 0.051 | 0.015 | 0.009 | 0.010 | 0.011 |
